# Supplementary material for: Rational design of carbon electrodes of thermoelectrochemical cells for efficient low-grade heat harvesting
Source: Royal Society of Chemistry journal article supplement (doi:10.1039/d2ta05327f), 2022-01-01
Supplement: d2ta05327f1.pdf [file d2ta05327f1.pdf]

## Supplementary Information

### **Rational design carbon electrode of thermoelectrochemical cells for efficient low-grade heat harvest**

Xinyan Zhuang<sup>a</sup>, Hongrun Jin<sup>a</sup>, Boyang Yu<sup>a</sup>, Hui Wang<sup>a</sup>, Yongxin Luo<sup>a</sup>, Kaisi Liu<sup>a</sup>, Bin Hu<sup>a</sup>,

Kefeng Xie<sup>b,\*</sup>, Liang Huang<sup>a,\*</sup>, Jiangjiang Duan<sup>a,\*</sup> and Jun Zhou<sup>a</sup>

<sup>a</sup> Wuhan National Laboratory for Optoelectronics, School of Optical and Electronic Information, Huazhong University of Science and Technology, Wuhan, 430074, China.

<sup>b</sup> School of Chemical and Biological Engineering, Lanzhou Jiaotong University, Lanzhou, 730000, China

\*Corresponding authors' e-mail addresses:

[jiangjduan@hust.edu.cn](mailto:jiangjduan@hust.edu.cn); [huangliang421@hust.edu.cn](mailto:huangliang421@hust.edu.cn); [xiekefeng@mail.lzjtu.cn](mailto:xiekefeng@mail.lzjtu.cn)

## Supplementary Figures

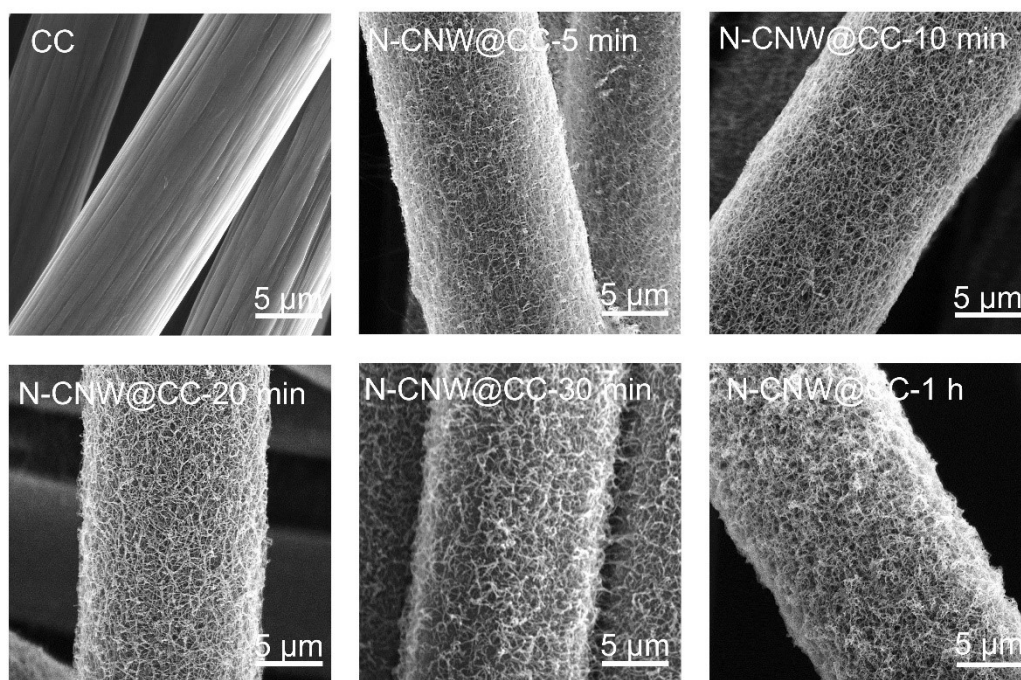

Fig. S1. SEM images of N-CNW@CC with different electrochemical polymerization times.

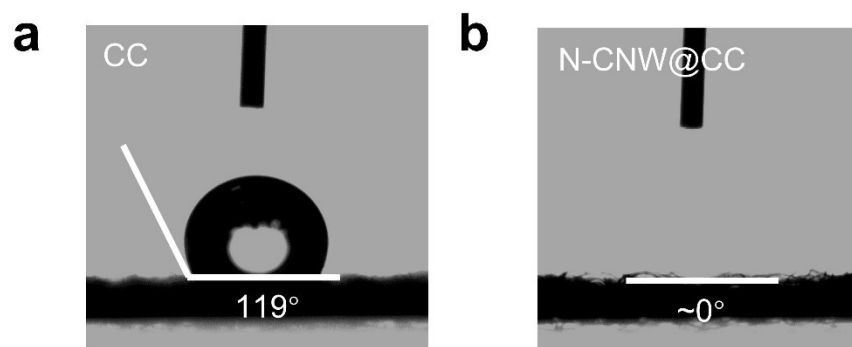

Fig. S2. The contact angle of original (a) carbon cloth and (b) N-CNW@CC.

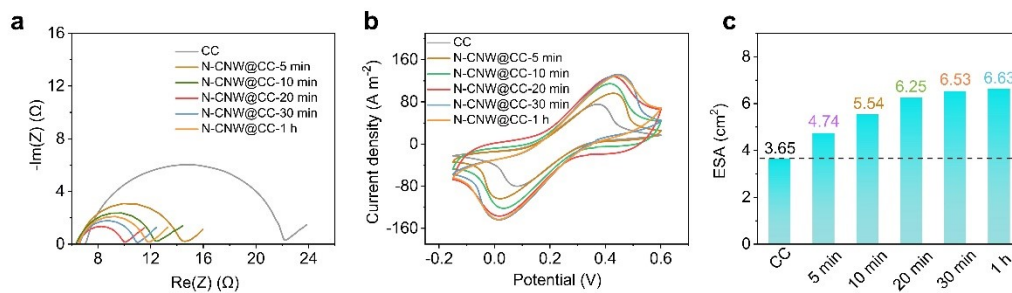

Fig. S3. The effects of electrochemical polymerization time. (a) Nyquist impedance plots (10kHz~50mHz), (b) Cyclic voltammograms ( $100\text{mV s}^{-1}$ ) and (c) Electroactive surface area (ESA) calculated by Randles-Sevcik equation for N-CNW@CC with different electrochemical polymerization time.

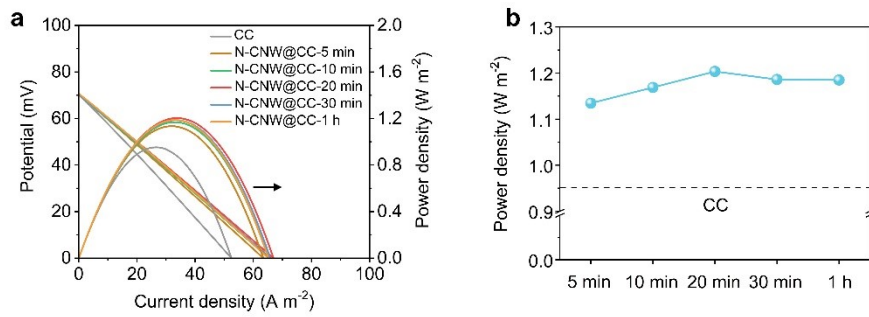

Fig. S4. (a) Current-voltage curves and their corresponding power densities for samples with different electrochemical polymerization times. ( $\Delta T=50^{\circ}\text{C}$ ). (b) The changing trend of  $P_{\text{max}}$  with increasing electrochemical polymerization time.

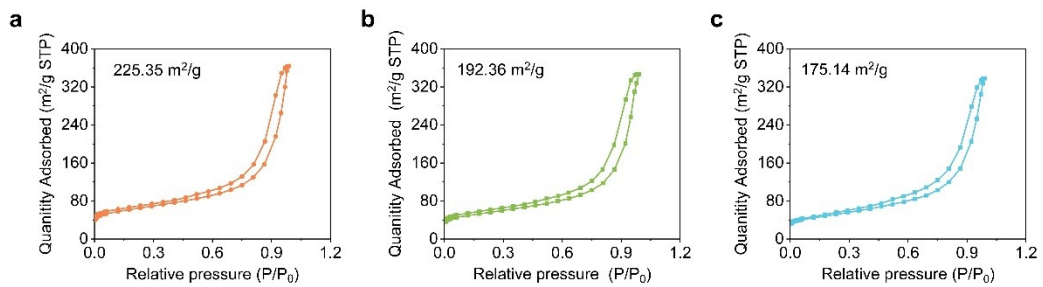

Fig. S5. N<sub>2</sub> sorption isotherm curves of the N-CNW@CC annealed at (a) 700°C, (b) 800°C, (c) 900°C.

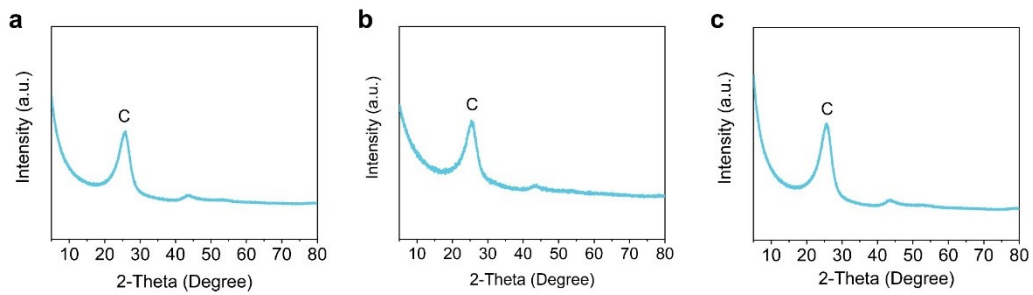

Fig. S6. XPS spectra of the N-CNW@CC annealed at (a) 700°C, (b) 800°C, (c) 900°C.

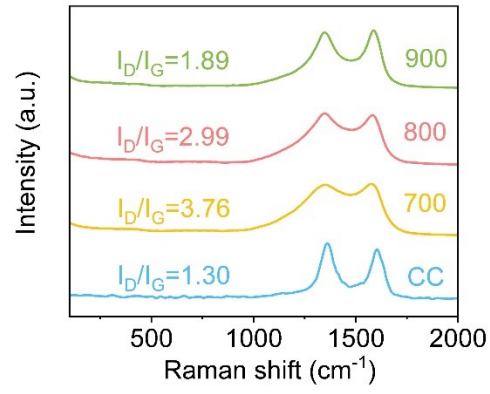

Fig. S7. Raman spectroscopy of electrodes annealed at 700, 800, 900°C.



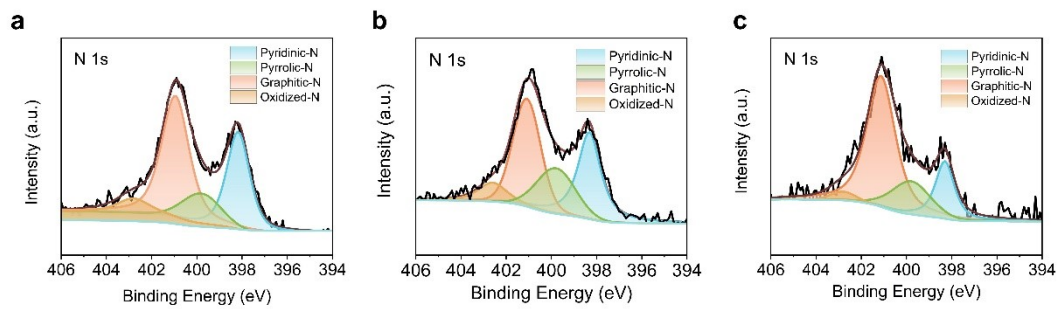

Fig. S8. N 1s XPS spectra of the N-CNW@CC annealed at (a) 700°C, (b) 800°C, (c) 900°C.

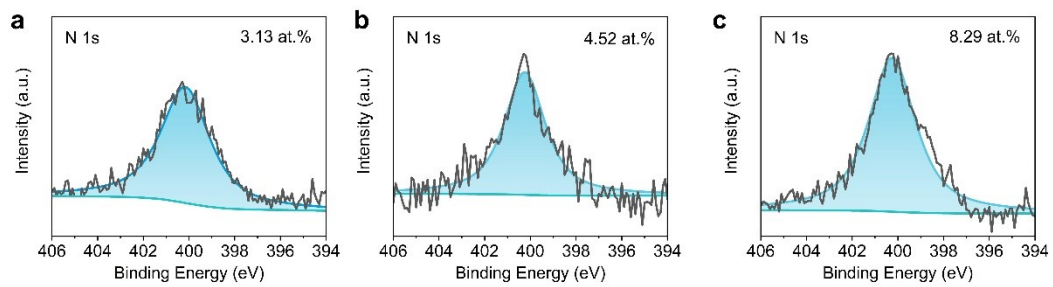

Fig. S9. N1s XPS spectra of single pyrrolic-nitrogen-doped carbon with nitrogen and carbon source mass ratios of (a) 1:7, (b) 1:3 and (c) 1:1.

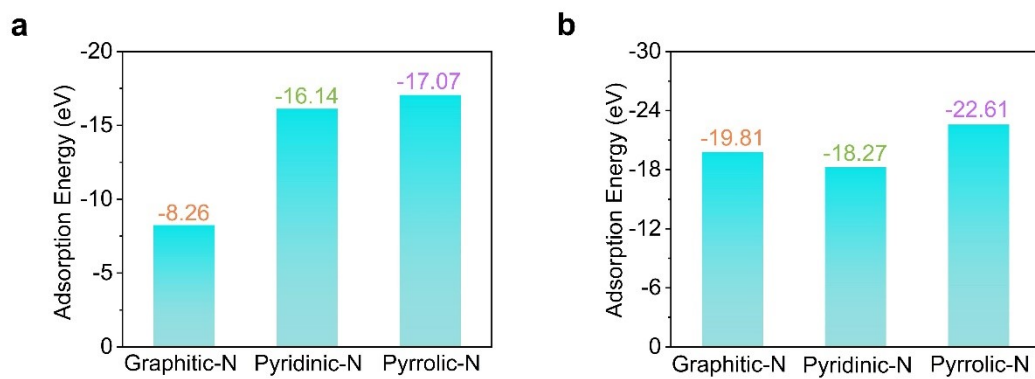

Fig. S10. Simulation calculation of adsorption energy of  $\text{Fe}(\text{CN})_6^{3-}$  and  $\text{Fe}(\text{CN})_6^{4-}$ . Adsorption energies of (a)  $\text{Fe}(\text{CN})_6^{3-}$  and (b)  $\text{Fe}(\text{CN})_6^{4-}$  on pyrrolic-N, pyridinic-N, graphitic-N.

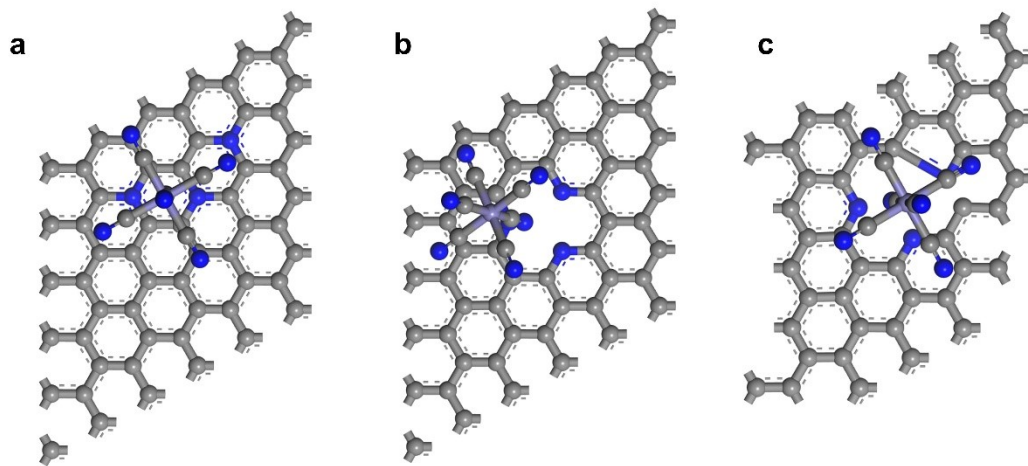

Fig. S11. Adsorbed structure of  $\text{Fe}(\text{CN})_6^{3-}$  and  $\text{Fe}(\text{CN})_6^{4-}$  on (a) graphitic-N, (b) pyridinic-N and (c) pyrrolic-N.

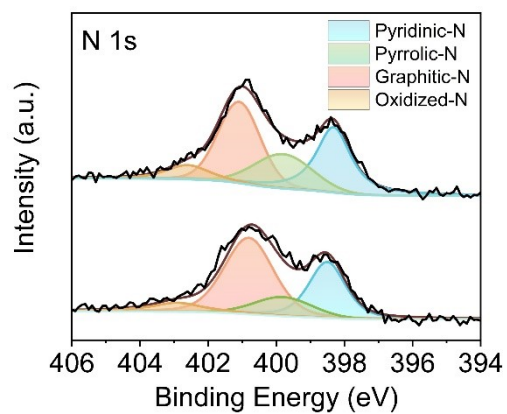

Fig. S12. N 1s XPS spectra of the N-CNW@CC before and after test in 0.4 M  $K_3Fe(CN)_6/K_3Fe(CN)_6$  with peaks deconvoluted into pyridinic-N, pyrrolic-N, graphitic-N, and oxidized-N species respectively.

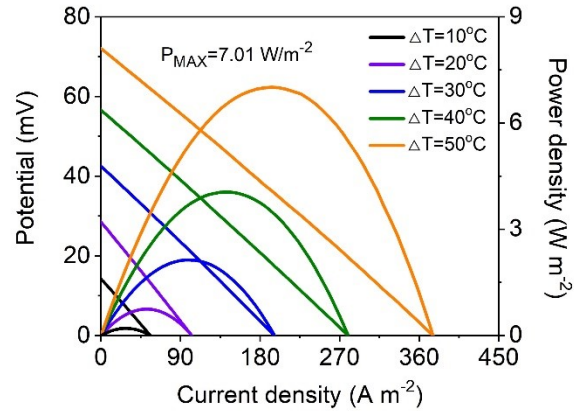

Fig. S13. Current-voltage curves and their corresponding power densities for N-CNW@CC-800 assemble in a modified TEC device with four-layer N-CNW@CC-800 electrodes for enhanced output.

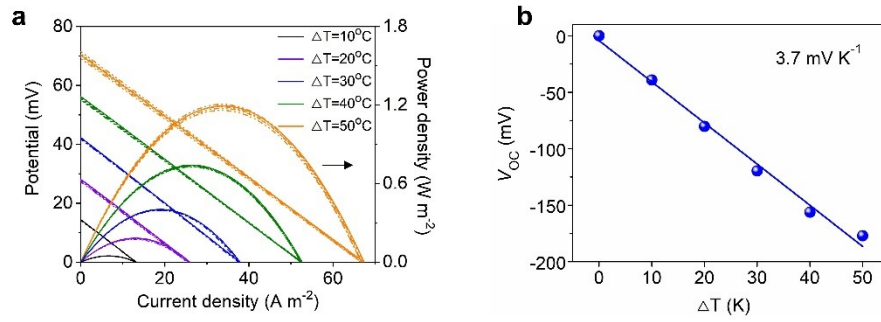

Fig. S14. (a) Current-voltage curves and their corresponding power densities for N-CNW@CC-800 assemble in a modified TEC device with four-layer N-CNW@CC-800 electrodes for enhanced output. (b) Open-circuit voltage ( $V_{oc}$ ) of the TEC at different values of  $\Delta T$ . The Seebeck coefficient ( $S_e$ ) is calculated from the slope of the  $V_{oc}$ - $\Delta T$  curves.

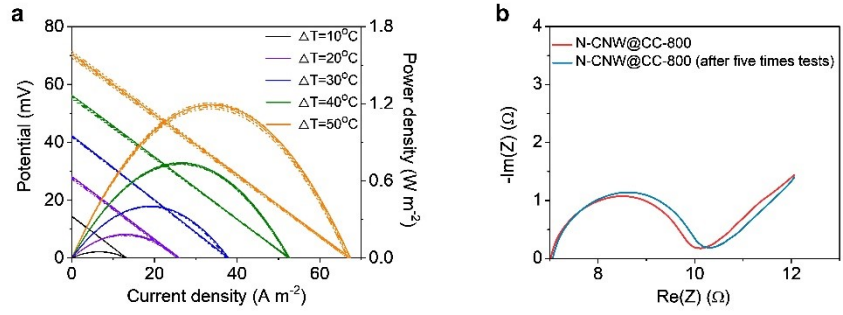

Fig. S15. (a) Current-voltage and their corresponding power densities curves of TEC assembled by N-CNW@CC-800, which were tested five times. (b) Nyquist impedance plots of N-CNW@CC-800 before and after five times tested.



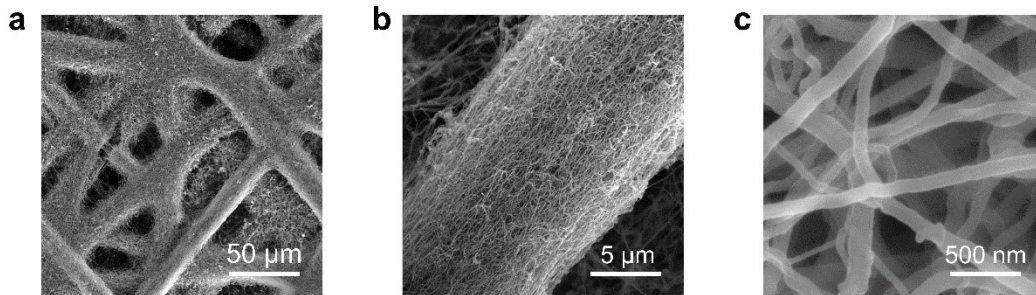

Fig. S16. SEM images of N-CNW@CP-800.

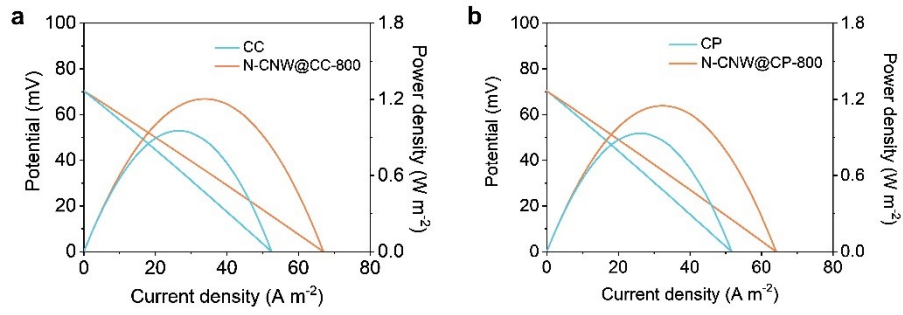

Fig. S17. Current-voltage and their corresponding power densities curves of TEC assembled by (a) carbon cloth and N-CNW@CC-800 and (b) carbon paper and N-CNW@CP. ( $\Delta T=50^{\circ}C$ ).

Table S1. Comparison of the thermoelectric property of TECs using N-CNW@CC electrode and optimized thermosensitive crystallization-boosted electrolyte (this work) with other electrolyte and electrode optimization reported in literatures.

| Electrode                                             | Electrolyte (ferro/ferricyanide redox couple)                         | $\Delta T$ (°C) | $P_{\max}$ (W m <sup>-2</sup> ) | $\eta_r$ (%)  | Reference |
|-------------------------------------------------------|-----------------------------------------------------------------------|-----------------|---------------------------------|---------------|-----------|
| N-CNW@CC                                              | optimized thermosensitive crystallization-boosted aqueous electrolyte | 40              | 17.45                           | 13.02         | This work |
| Carbon Paper                                          | thermosensitive crystallization-boosted aqueous electrolyte           | 40              | 14.8                            | 11.1          | 1         |
| Anisotropic holey graphene aerogel                    | eutectic electrolyte consisting of formamide and water                | 106             | 3.6                             | 0.7           | 2         |
| Graphene-carbon sphere polyolithic aerogels           | water                                                                 | ~62             | 1.05                            | 1.4           | 3         |
| SWCNTs                                                | water                                                                 | 20              | 0.09                            | 0.275         | 4         |
| SWNT-rGO composites                                   | water                                                                 | 31              | 0.327                           | 0.64          | 5         |
| Activated carbon textile coated with carbon nanotubes | water                                                                 | 3.4             | 0.46                            | Not mentioned | 6         |
| Carbon multi-walled nanotube foam                     | water                                                                 | 86              | 1.2                             | 0.4           | 7         |
| carbon nanotube aerogel sheet                         | water                                                                 | 51              | 6.6                             | 3.95          | 8         |

Table S2. The ion diffusion coefficients from the EIS.

| Sample            | diffusion coefficients ( $\sigma$ ) |
|-------------------|-------------------------------------|
| Pure carbon cloth | 0.114                               |
| N-CNW@CC (5 min)  | 0.098                               |
| N-CNW@CC (10 min) | 0.095                               |
| N-CNW@CC (20 min) | 0.092                               |
| N-CNW@CC (30 min) | 0.095                               |
| N-CNW@CC(1 h)     | 0.094                               |

- 1 B. Yu, J. Duan, H. Cong, W. Xie, R. Liu, X. Zhuang, H. Wang, B. Qi, M. Xu, L. Wang Zhong and J. Zhou, *Science*, 2020, **370**, 342-346.
- 2 G. Li, D. Dong, G. Hong, L. Yan, X. Zhang and W. Song, *Adv. Mater.*, 2019, **31**, 1901403.
- 3 D. Dong, H. Guo, G. Li, L. Yan, X. Zhang and W. Song, *Nano Energy*, 2017, **39**, 470-477.
- 4 T. J. Kang, S. Fang, M. E. Kozlov, C. S. Haines, N. Li, Y. H. Kim, Y. Chen and R. H. Baughman, *Adv. Funct. Mater.*, 2012, **22**, 477-489.
- 5 M. S. Romano, N. Li, D. Antiohos, J. M. Razal, A. Nattestad, S. Beirne, S. Fang, Y. Chen, R. Jalili, G. G. Wallace, R. Baughman and J. Chen, *Adv. Mater.*, 2013, **25**, 6602-6606.
- 6 H. Im, H. G. Moon, J. S. Lee, I. Y. Chung, T. J. Kang and Y. H. Kim, *Nano Res.*, 2014, **7**, 443-452.
- 7 L. Zhang, T. Kim, N. Li, T. J. Kang, J. Chen, J. M. Pringle, M. Zhang, A. H. Kazim, S. Fang, C. Haines, D. Al-Masri, B. A. Cola, J. M. Razal, J. Di, S. Beirne, D. R. Macfarlane, A. Gonzalez-Martin, S. Mathew, Y. H. Kim, G. Wallace and R. H. Baughman, *Adv. Mater.*, 2017, **29**, 1605652.
- 8 H. Im, T. Kim, H. Song, J. Choi, J. S. Park, R. Ovalle-Robles, H. D. Yang, K. D. Kihm, R. H. Baughman, H. H. Lee, T. J. Kang and Y. H. Kim, *Nat. Commun.*, 2016, **7**, 10600.
